# Supplementary figures and images for: Improving the specificity of high-throughput ortholog prediction
Source: Springer Nature journal article supplement (doi:10.1186/1471-2105-7-270), 2006-05-28

(Figure 8, continued...)

(C)

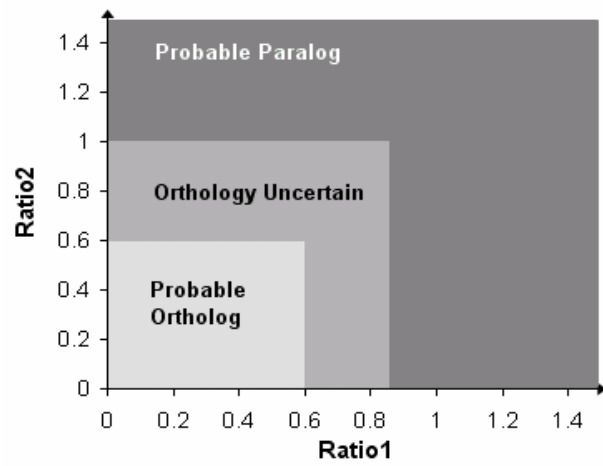

Supplement: 12859_2005_1009_MOESM11_ESM.pdf [file 12859_2005_1009_MOESM11_ESM.pdf]
